# Supplementary material for: N-heterocyclic carbenes of iridium(I): ligand effects on the catalytic activity in transfer hydrogenation
Source: Royal Society of Chemistry journal article supplement (doi:10.1039/b906855d), 2009-01-01
Supplement: b906855d.pdf [file b906855d.pdf]

# N-Heterocyclic Carbenes of Iridium(I): Ligand Effects on the Catalytic Activity in Transfer Hydrogenation

Sandra C. Zinner<sup>a</sup>, Christoph F. Rentzsch<sup>a</sup>, Eberhardt Herdtweck<sup>a</sup>, Wolfgang A. Herrmann<sup>\*a</sup>, and Fritz. E. Kühn<sup>\*a,b</sup>

<sup>a</sup> Chair of Inorganic Chemistry, Department of Chemistry, Technische Universität München, Lichtenbergstraße 4, D-85747 Garching, Germany (E-mail: wolfgang.herrmann@ch.tum.de)

<sup>b</sup> Molecular Catalysis, Catalysis Research Center, Technische Universität München, Lichtenbergstraße 4, D-85747 Garching, Germany (E-Mail: fritz.kuehn@ch.tum.de)

## Crystal Structure Determinations

Compound 1-Cl    October 15<sup>th</sup> 2007

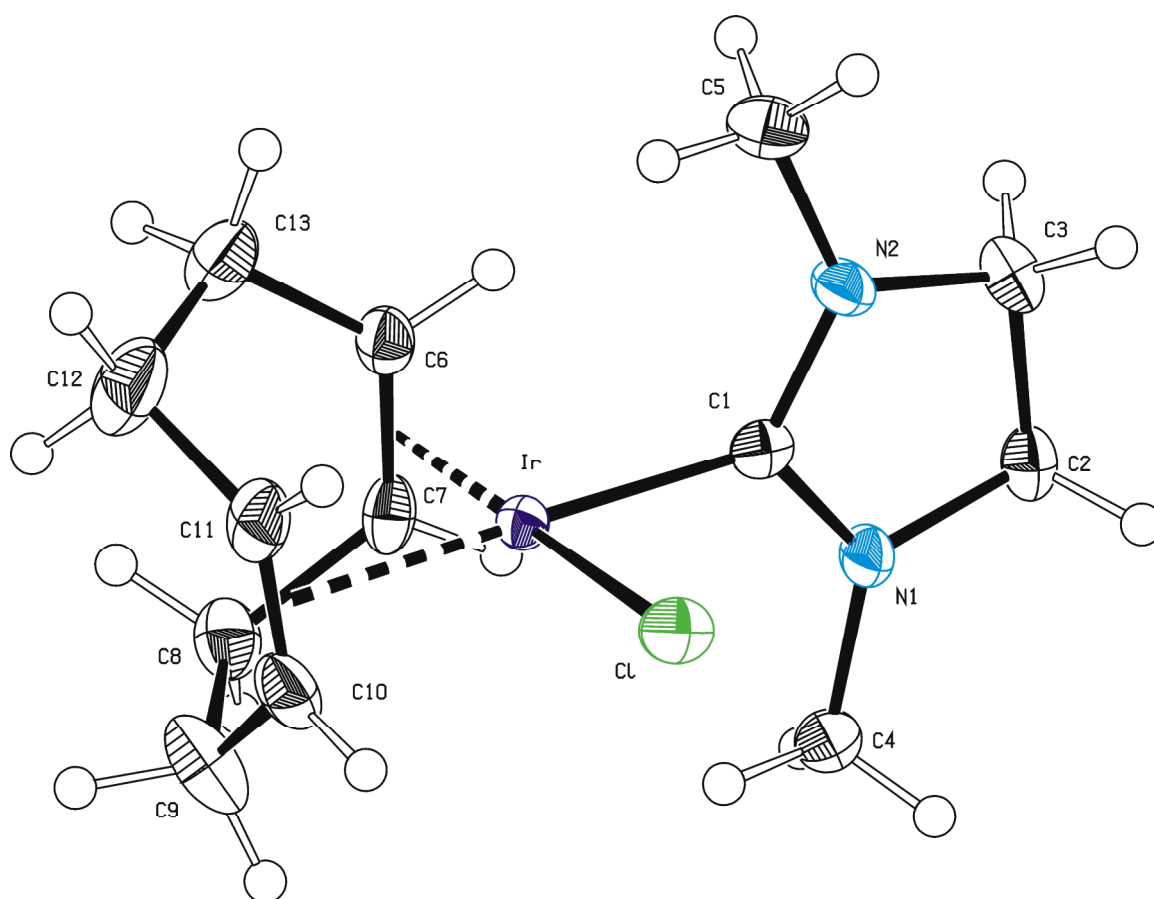

Molecular Formula:  $C_{13} H_{22} Cl Ir N_2$   
Crystal Color / Shape: Orange fragment  
Crystal Size: Approximate size of crystal fragment used for data collection:  
 $0.20 \times 0.25 \times 0.56$  mm

Molecular Weight: 434.00 a.m.u.  
 $F_{000}$ : 832  
Systematic Absences:  $h00: h \neq 2n; 0k0: k \neq 2n, 00l: l \neq 2n$   
Space Group: Orthorhombic  $P 2_1 2_1 2_1$  (I.T.-No.: 19)

Cell Constants: Least-squares refinement of 47286 reflections with the program "CRYSTALIS"  
[1]; theta range  $3.07^\circ < \theta < 25.34^\circ$ ; Mo(K $\alpha$ );  $\lambda = 71.073$  pm

$a = 725.73(1)$  pm  
 $b = 1234.28(1)$  pm  
 $c = 1572.79(1)$  pm

$V = 1408.83(2) \cdot 10^6$  pm<sup>3</sup>;  $Z = 4$ ;  $D_{\text{calc}} = 2.046$  g cm<sup>-3</sup>

Diffractometer: Xcalibur<sup>TM</sup>3;  $\kappa$ -CCD (Area Diffraction System; OXFORD DIFFRACTIONS);  
sealed tube, graphite monochromator; 50 kV; 40 mA;  $\lambda = 71.073$  pm;  
Mo(K $\alpha$ )

Temperature:  $(-120 \pm 1)^\circ\text{C}$ ;  $(153 \pm 1)$  K

Measurement Range:  $3.07^\circ < \theta < 25.34^\circ$ ; h: -8/8, k: -14/14, l: -18/18

Measurement Time: 10 s per film

Measurement Mode: measured: 10 sets; 1552 films / scaled: 10 sets; 1552 films  
 $\varphi$ - and  $\omega$ -movement; Increment:  $\Delta\varphi/\Delta\omega = 1.00^\circ$ ; dx = 50.0 mm

LP - Correction: Yes [1]

Intensity Correction: No/Yes; during scaling [1]

Absorption Correction: No/Yes; during scaling;  $\mu = 9.648$  mm<sup>-1</sup> [1]

Reflection Data: 34338 reflections were integrated  
127 reflections systematic absent and rejected  
34211 reflections to be merged  
0.0302  $R_{\text{int}}$ : (basis  $F_o^2$ )  
2576 independent reflections (all) were used in refinements  
2559 independent reflections with  $I_o > 2\sigma(I_o)$   
99.9 % completeness of the data set  
157 parameter full-matrix refinement  
16.4 reflections per parameter

Solution: Direct Methods [2]; Difference Fourier syntheses

Refinement Parameters: In the asymmetric unit:  
17 Non-hydrogen atoms with anisotropic displacement parameters

Hydrogen Atoms: In the difference map(s) calculated from the model containing all non-hydrogen atoms, not all of the hydrogen positions could be determined from the highest peaks. For this reason, the hydrogen atoms were placed in calculated positions ( $d_{\text{C-H}} = 95, 98, 99$  pm). Isotropic displacement parameters were calculated from the parent carbon atom ( $U_{\text{H}} = 1.2/1.5 U_{\text{C}}$ ). The hydrogen atoms were included in the structure factor calculations but not refined.

Atomic Form Factors: For neutral atoms and anomalous dispersion [3]

Extinction Correction:  $F_c(\text{korr}) = kF_c[1 + 0.001 \cdot \varepsilon \cdot F_c^2 \cdot \lambda^3/\sin(2\theta)]^{-1/4}$  SHELXL-97 [4]  
 $\varepsilon$  refined to  $\varepsilon = 0.0016(1)$

Weighting Scheme:  $w^{-1} = \sigma^2(F_o^2) + (a \cdot P)^2 + b \cdot P$   
with a: 0.0191; b: 2.3014; P:  $[\text{Maximum}(0 \text{ or } F_o^2) + 2 \cdot F_c^2]/3$

Shift/Err: Less than 0.002 in the last cycle of refinement:

Resid. Electron Density:  $+1.15 e_0^-/\text{\AA}^3$ ;  $-0.59 e_0^-/\text{\AA}^3$

R1:  $\Sigma(|F_o| - |F_c|)/\Sigma|F_o|$   
 $[F_o > 4\sigma(F_o); N=2559]: = 0.0149$   
 $[\text{all reflctns}; N=2576]: = 0.0151$

wR2:  $[\Sigma w(F_o^2 - F_c^2)^2/\Sigma w(F_o^2)^2]^{1/2}$

|                                  |                                                             |          |
|----------------------------------|-------------------------------------------------------------|----------|
| $[F_o > 4\sigma(F_o)$ ; N=2559]: |                                                             | = 0.0373 |
| [all refltns; N=2576]:           |                                                             | = 0.0374 |
| Goodness of fit:                 | $[\sum w(F_o^2 - F_c^2)^2 / (\text{NO} - \text{NV})]^{1/2}$ | = 1.174  |
| Flack's Parameter :              | x = -0.016(8)                                               |          |
| Remarks:                         | Refinement expression $\sum w(F_o^2 - F_c^2)^2$             |          |

The correct enantiomere is proved by Flack's Parameter.

#### References:

- [1] CrysAlis Data Collection Software and Data Processing Software for Oxford Xcalibur diffractometer, Version 1.171, Oxford Diffraction Ltd., Oxfordshire, United Kingdom, 2005.
- [2] Altomare, A.; Casciarano, G.; Giacovazzo, C.; Guagliardi, A.; Burla, M. C.; Polidori, G.; Camalli M. "SIR92", *J. Appl. Cryst.* **1994**, *27*, 435-436.
- [3] International Tables for Crystallography, Vol. C, Tables 6.1.1.4 (pp. 500-502), 4.2.6.8 (pp. 219-222), and 4.2.4.2 (pp. 193-199), Wilson, A. J. C., Ed., Kluwer Academic Publishers, Dordrecht, The Netherlands, 1992.
- [4] Sheldrick, G. M. "SHELXL-97", University of Göttingen, Göttingen, Germany, (1998).
- [5] Spek, A. L. "PLATON", A Multipurpose Crystallographic Tool, Utrecht University, Utrecht, The Netherlands, (2007).
- [6] L. J. Farrugia, "WinGX (Version 1.70.01 January 2005) ", *J. Appl. Cryst.* **1999**, *32*, 837-838.
- [7] a) The Cambridge Structural Database: a quarter of a million crystal structures and rising; Allen, F. H. *Acta Crystallogr.* **2002**, *B58*, 380-388. b) New Software for searching the Cambridge Structural Database and visualizing crystal structures; Bruno, I. J.; Cole, J. C.; Edgington, P. R.; Kessler, M.; Macrae, C. F.; McCabe, P.; Pearson, J.; Taylor, R. *Acta Crystallogr.* **2002**, *B58*, 389-397.

### Compound 5-Cl July 22<sup>th</sup> 2008

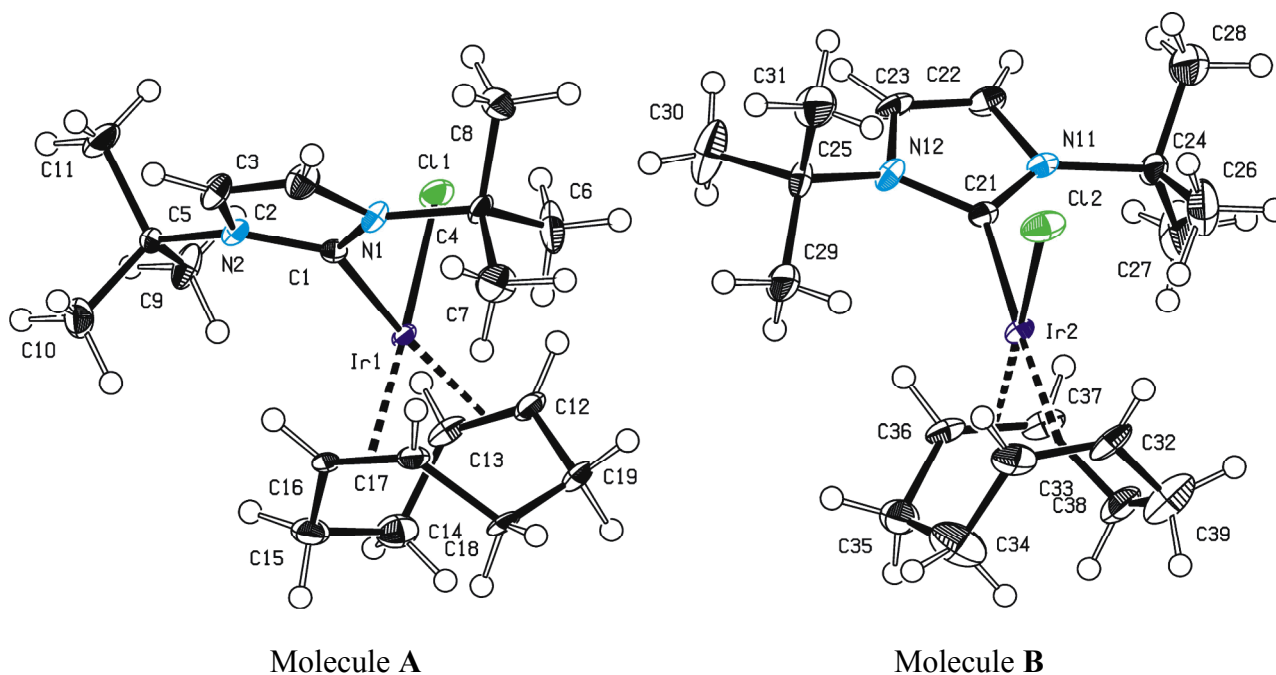

Molecular Formula: C<sub>19</sub> H<sub>32</sub> Cl Ir N<sub>2</sub>

Crystal Color / Shape      Yellow fragment  
Crystal Size                    Approximate size of crystal fragment used for data collection:  
                                         0.38 × 0.51 × 0.63 mm

Molecular Weight:            516.14 a.m.u.  
F<sub>000</sub>:                                2032  
Systematic Absences:        h0l: l≠2n; 0k0: k≠2n  
Space Group:                    Monoclinic      *P* 2<sub>1</sub>/*c*      (I.T.-No.: 14)  
Cell Constants:                 Least-squares refinement of 9670 reflections with the programs "APEX  
suite" and "SAINT" [1,2]; theta range 3.37° <  $\theta$  < 67.04°; Cu(K $\alpha$ );  $\lambda$  =  
154.180 pm

*a* =                                1119.62(4) pm  
*b* =                                1944.17(6) pm                     $\beta$  =                                91.4342(15)°  
*c* =                                1775.86(6) pm

Diffraction:                    *V* = 3864.4(2) · 10<sup>6</sup> pm<sup>3</sup>; *Z* = 8; *D*<sub>calc</sub> = 1.774 g cm<sup>-3</sup>; Mos. = 0.54  
Kappa APEX II (Area Diffraction System; BRUKER AXS); sealed tube;  
graphite monochromator; 40 kV; 30 mA;  $\lambda$  = 154.180 pm; Cu(K $\alpha$ )

Temperature:                    (-100±1) °C;                                (173±1) K  
Measurement Range:          3.37° <  $\theta$  < 67.04°; h: -13/12, k: -13/22, l: -20/20  
Measurement Time:            10 s per film  
Measurement Mode:            measured: 17 runs; 5620 films / scaled: 17 runs; 5620 films  
 $\varphi$ - and  $\omega$ -movement; Increment:  $\Delta\varphi/\Delta\omega$  = 1.00°; dx = 40.0 mm

LP - Correction:                Yes [2]  
Intensity Correction            No/Yes; during scaling [2]  
Absorption Corrections:      Mathematical absorption correction; SHX\_ABS [6];  $\mu$  = 14.639 mm<sup>-1</sup>  
Correction Factors:            *T*<sub>min</sub> = 0.0472                    *T*<sub>max</sub> = 0.4662

Reflection Data:                48868                    reflections were integrated  
                                         1184                    reflections systematic absent and rejected  
                                         47684                    reflections to be merged  
                                         6727                    independent reflections  
                                         0.1273                    *R*<sub>int</sub>: (basis *F*<sub>o</sub><sup>2</sup>)  
                                         6727                    independent reflections (all) were used in refinements  
                                         6636                    independent reflections with *I*<sub>o</sub> > 2 $\sigma$ (*I*<sub>o</sub>)  
                                         97.4 %                    completeness of the data set  
                                         428                    parameter full-matrix refinement  
                                         15.7                    reflections per parameter

Solution:                        Direct Methods [3]; Difference Fourier syntheses  
Refinement Parameters:        In the asymmetric unit:  
                                         46                    Non-hydrogen atoms with anisotropic displacement  
                                         parameters

Hydrogen Atoms:                In the difference map(s) calculated from the model containing all non-  
hydrogen atoms, not all of the hydrogen positions could be determined from  
the highest peaks. For this reason, the hydrogen atoms were placed in  
calculated positions (*d*<sub>C-H</sub> = 95, 98, 99 pm). Isotropic displacement  
parameters were calculated from the parent carbon atom (*U*<sub>H</sub> = 1.2/1.5 *U*<sub>C</sub>).  
The hydrogen atoms were included in the structure factor calculations but  
not refined.

Atomic Form Factors:          For neutral atoms and anomalous dispersion [4]  
Extinction Correction:          *F*<sub>c</sub> (korr) = *kF*<sub>c</sub>[1 + 0.001 ·  $\varepsilon$  · *F*<sub>c</sub><sup>2</sup> ·  $\lambda^3/\sin(2\theta)$ ]<sup>-1/4</sup> SHELXL-97 [5]  
                                          $\varepsilon$  refined to  $\varepsilon$  = 0.00057(3)

Weighting Scheme:  $w^{-1} = \sigma^2(F_o^2) + (a*P)^2 + b*P$   
with a: 0.0503; b: 21.0899; P: [Maximum(0 or  $F_o^2$ )+2\* $F_c^2$ ]/3

Shift/Err: Less than 0.002 in the last cycle of refinement:

Resid. Electron Density: +2.42 e<sub>0</sub><sup>-</sup>/Å<sup>3</sup>; -2.05 e<sub>0</sub><sup>-</sup>/Å<sup>3</sup>

R1:  $\Sigma(|F_o| - |F_c|) / \Sigma|F_o|$

[ $F_o > 4\sigma(F_o)$ ; N=6636]: = 0.0425  
[all reflctns; N=6727]: = 0.0430

wR2:  $[\Sigma w(F_o^2 - F_c^2)^2 / \Sigma w(F_o^2)^2]^{1/2}$

[ $F_o > 4\sigma(F_o)$ ; N=6636]: = 0.1116  
[all reflctns; N=6727]: = 0.1120

Goodness of fit:  $[\Sigma w(F_o^2 - F_c^2)^2 / (\text{NO} - \text{NV})]^{1/2}$  = 1.181

Remarks: Refinement expression  $\Sigma w(F_o^2 - F_c^2)^2$

### References:

- [1] APEX suite of crystallographic software. APEX 2 Version 2008.4. Bruker AXS Inc., Madison, Wisconsin, USA (2008).
- [2] SAINT, Version 7.56a and SADABS Version 2008/1. Bruker AXS Inc., Madison, Wisconsin, USA (2008).
- [3] Altomare, A.; Cascarano, G.; Giacovazzo, C.; Guagliardi, A.; Burla, M. C.; Polidori, G.; Camalli M. "SIR92", *J. Appl. Cryst.* **1994**, 27, 435-436.
- [4] International Tables for Crystallography, Vol. C, Tables 6.1.1.4 (pp. 500-502), 4.2.6.8 (pp. 219-222), and 4.2.4.2 (pp. 193-199), Wilson, A. J. C., Ed., Kluwer Academic Publishers, Dordrecht, The Netherlands, 1992.
- [5] Sheldrick, G. M. "SHELXL-97", University of Göttingen, Göttingen, Germany, (1998).
- [6] Spek, A. L. "PLATON", A Multipurpose Crystallographic Tool, Utrecht University, Utrecht, The Netherlands, (2007).
- [7] L. J. Farrugia, "WinGX (Version 1.70.01 January 2005)", *J. Appl. Cryst.* **1999**, 32, 837-838.
- [8] a) The Cambridge Structural Database: a quarter of a million crystal structures and rising; Allen, F. H. *Acta Crystallogr.* **2002**, B58, 380-388. b) New Software for searching the Cambridge Structural Database and visualizing crystal structures; Bruno, I. J.; Cole, J. C.; Edgington, P. R.; Kessler, M.; Macrae, C. F.; McCabe, P.; Pearson, J.; Taylor, R. *Acta Crystallogr.* **2002**, B58, 389-397.
